# Supplementary material for: Effects of media composition and light exposure on the electrochemical current response during scanning electrochemical microscopy live cell imaging
Source: Royal Society of Chemistry journal article supplement (doi:10.1039/d4an01075b), 2024-01-01
Supplement: d4an01075b1.pdf [file d4an01075b1.pdf]

## Supplementary Information

### **Effects of Media Composition and Light Exposure on the Electrochemical Current Response during Scanning Electrochemical Microscopy Live Cell Imaging**

Nikita Thomas<sup>a</sup>, Mengzhen Lyu<sup>a</sup>, Jadon Khouv<sup>a</sup>, Dhésmon Lima<sup>b</sup> and Sabine Kuss<sup>a\*</sup>

<sup>a</sup>University of Manitoba, Department of Chemistry, Winnipeg R3T 2N2, Canada.

<sup>b</sup>Mount Saint Vincent University, Department of Chemistry and Physics, Halifax B3M 2J6, Canada

\*Corresponding author Email: [sabine.kuss@umanitoba.ca](mailto:sabine.kuss@umanitoba.ca)

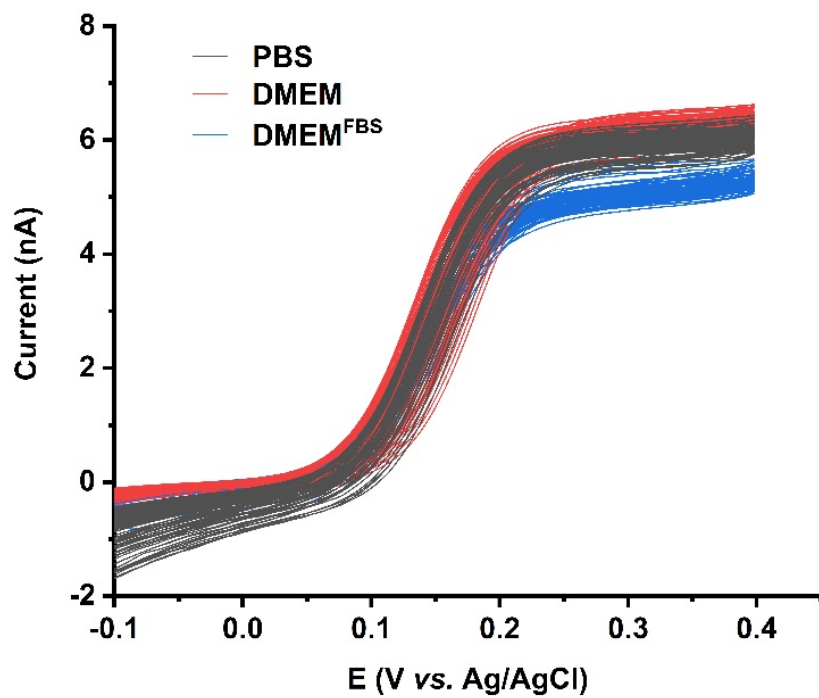

**Figure S1.** 50 cyclic voltammetry sweeps in 1 mM FcCH<sub>2</sub>OH dissolved in PBS (black), DMEM (red) and DMEM<sup>FBS</sup> (blue) at 50 mV/s.

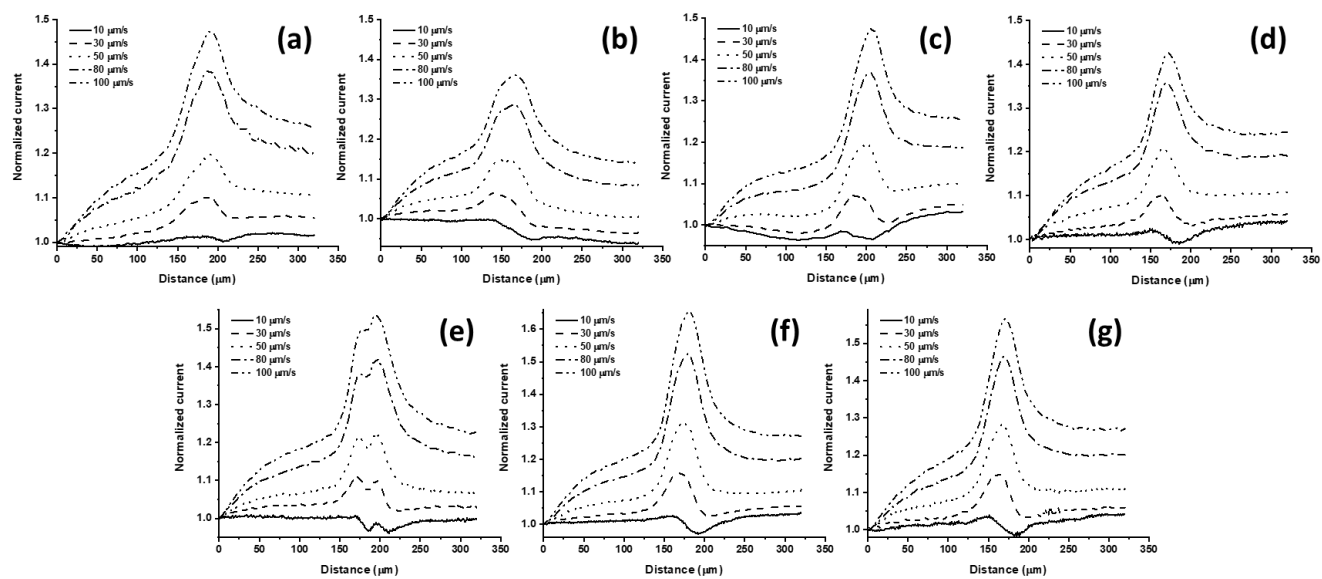

**Figure S2.** (a-g) Line scans across HeLa cells in PBS solution containing 1 mM FcCH<sub>2</sub>OH.

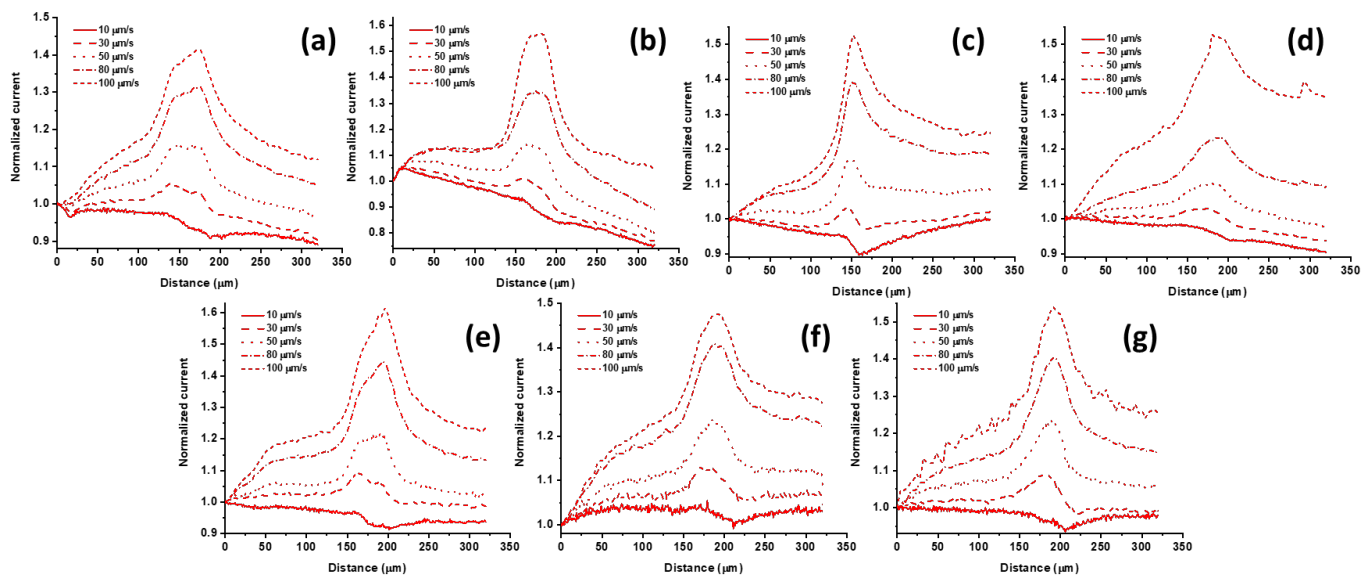

**Figure S3.** (a-g) Line scans across HeLa cells in 1 mM FcCH<sub>2</sub>OH in DMEM .

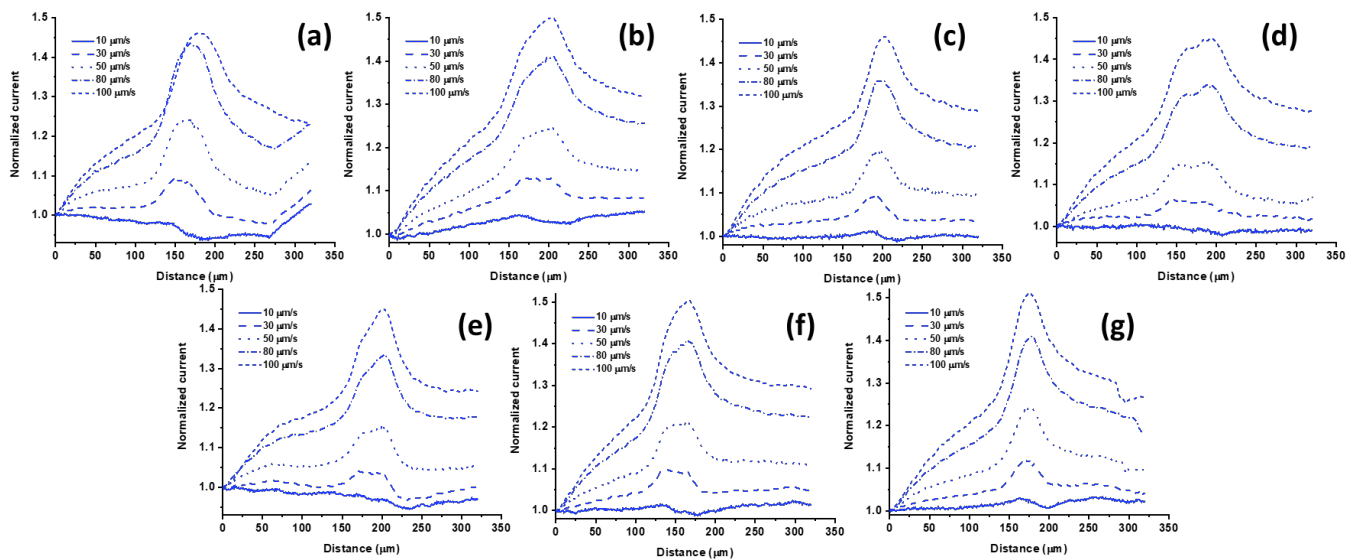

**Figure S4.** (a-g) Line scans across HeLa cells in 1 mM FcCH<sub>2</sub>OH in DMEM with 10% FBS.

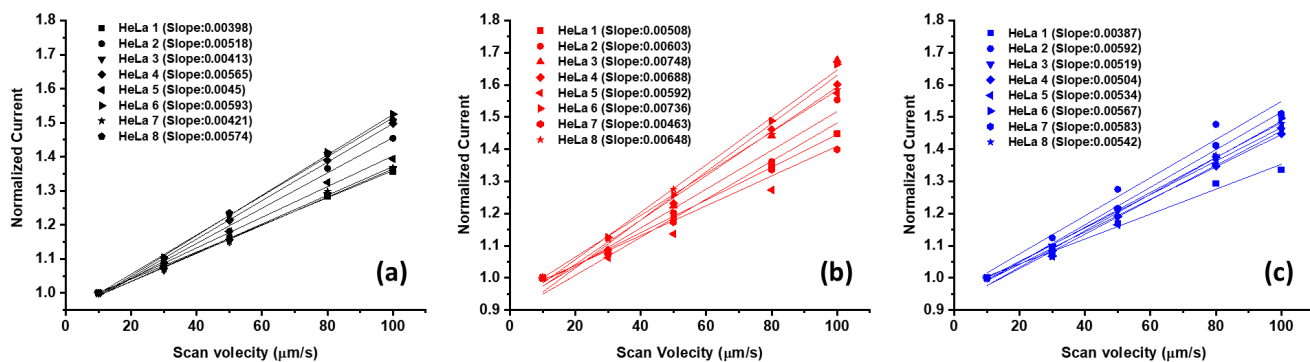

**Figure S5.** Linear relationships of normalized peak current with scan velocity for HeLa cells in 1 mM FcCH<sub>2</sub>OH dissolved in (a) PBS b), DMEM (c) DMEM<sup>FBS</sup>

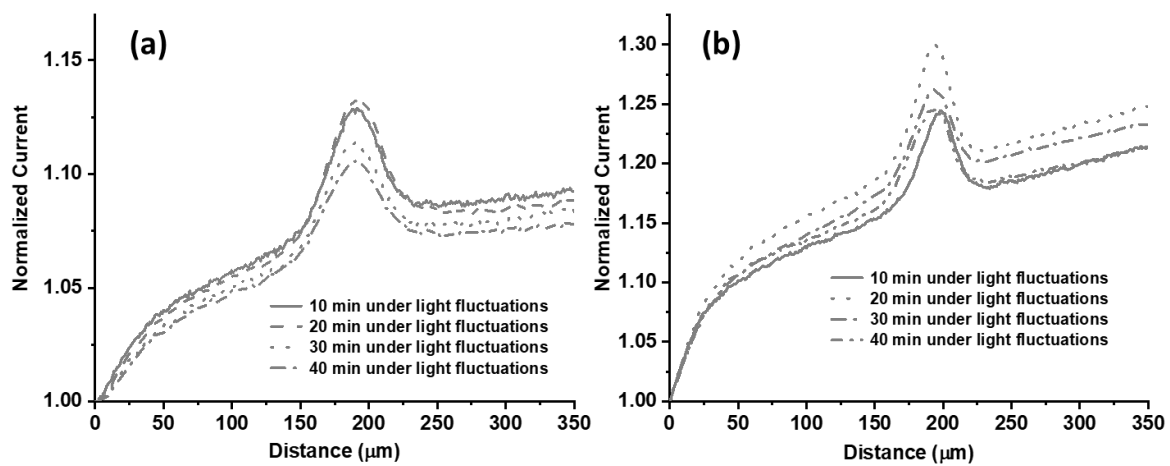

**Figure S6.** Additional data. (a-b) 2D line scans across HeLa cells under fluctuating light at 10,20,30,and 40 minute time intervals .

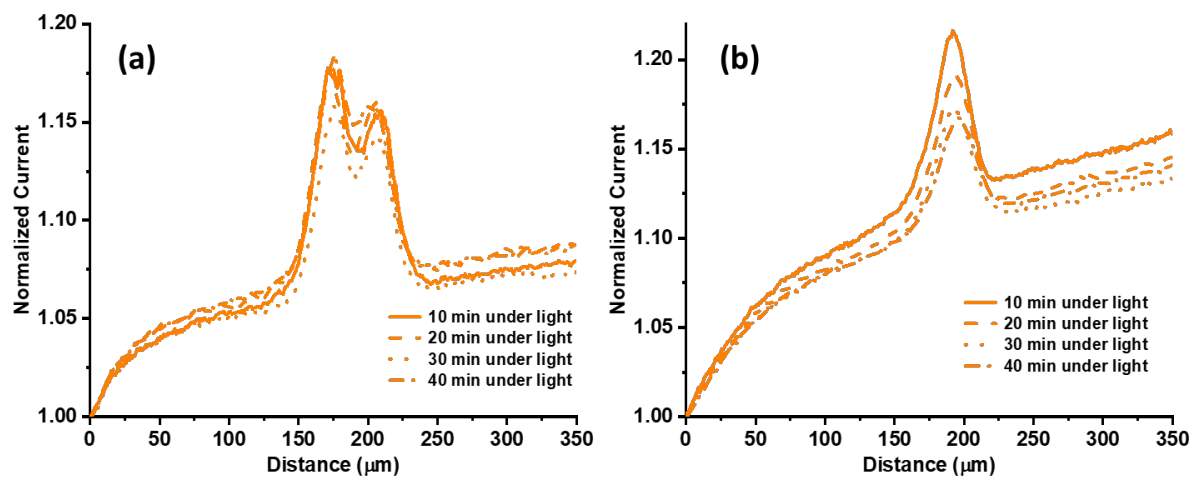

Figure S7. Additional data. (a-b) 2D line scans across HeLa cells in full light at 10,20,30,and 40 minute time intervals



## Slope Test

SE: Standard Error

S: Slope

$$x = \sqrt{(SE1)^2 + (SE2)^2}$$

$$y = \frac{S_1 - S_2}{x}$$

|          | Slope   | Error    |
|----------|---------|----------|
| PBS      | 0.00464 | 1.59E-04 |
| DMEM     | 0.00543 | 3.75E-04 |
| DMEM FBS | 0.00507 | 1.77E-04 |

| <b>PBS &amp; DMEM</b>      |             |
|----------------------------|-------------|
| x                          | y           |
| 0.00041                    | 1.940504535 |
|                            |             |
| <b>PBS &amp; DMEM FBS</b>  |             |
| x                          | y           |
| 0.00024                    | 1.803003006 |
|                            |             |
| <b>DMEM &amp; DMEM FBS</b> |             |
| x                          | y           |
| 0.00041                    | 0.86864141  |

$y <$  critical value of 2.365 at  $df=7$  and 95% confidence interval for the three combinations.
